# Supplementary material for: DFT studies of Ni cluster on graphene surface: effect of CO2 activation
Source: Royal Society of Chemistry journal article supplement (doi:10.1039/c6ra14009b), 2016-01-01
Supplement: c6ra14009b1.pdf [file c6ra14009b1.pdf]

# **DFT Studies of Small Ni Cluster on Graphene Surface: Effect of CO<sub>2</sub> Activation**

He Xu<sup>a,b</sup>, Wei Chu<sup>a,b</sup>, Wenjing Sun<sup>c</sup>, Chengfa Jiang<sup>a,b,\*</sup>, Zhongqing Liu<sup>a,\*</sup>

<sup>a</sup>School of Chemical Engineering Sichuan University, Chengdu 610065, China

<sup>b</sup>Sichuan Provincial Environmental Protection Center for Catalytic Materials  
Engineering Technology, Chengdu 610064, China

<sup>c</sup>China-America Cancer Research Institute, Key Laboratory for Medical Molecular  
Diagnostics of Guangdong Province, Guangdong Medical University, Dongguan,  
Guangdong 523808, China;

---

\*Corresponding author

Email address: jiangcf@scu.edu.cn (Prof. Chengfa Jiang)

liuzq\_hgxy@scu.edu.cn (Prof. Zhongqing Liu).

The project was supported by National Basic Research Program of China (973 Program) (2011CB201202) & the National Natural Science Foundation of China (No. 21376154).

## Figure and table Captions:

**Figure S1.** The optimized structures of (a) perfect-graphene sheet, (b) one Ni atom deposited on graphene with an elevation ( $h$ ) of 1.498 Å.

**Figure S2.** PDOS of Ni atom and C atom in a) three, b) five, c) seven and d) ten Ni atoms adsorbed on MGr. The PDOS is projected on the orbitals of C (red) and Ni (black) atoms.

**Figure S3.** Stable configurations of CO<sub>2</sub> adsorbed on Ni<sub>4</sub>, Ni<sub>5</sub>, Ni<sub>6</sub> and Ni<sub>10</sub>.

**Figure S4.** Stable configurations of CO<sub>2</sub> adsorbed on MGr surface deposition of Ni<sub>4</sub>, Ni<sub>5</sub>, Ni<sub>6</sub> and Ni<sub>10</sub>.

**Figure S5.** Sum of density of states projected on the atoms of the CO<sub>2</sub> molecule adsorbed on isolated Ni<sub>4</sub> (red), on MGr surface (blue) and on the Ni<sub>4</sub>/MGr system (green). The zero energy is set to the highest occupied state of corresponding system.

**Table S1** Binding energy  $E_B$ , C-O bond length  $d_{C-O}$  and O-C-O angle  $\alpha_{O-C-C}$  of CO<sub>2</sub> adsorbed on an isolated Ni<sub>x</sub> cluster, on MGr and on a graphene doped Ni<sub>x</sub> cluster.

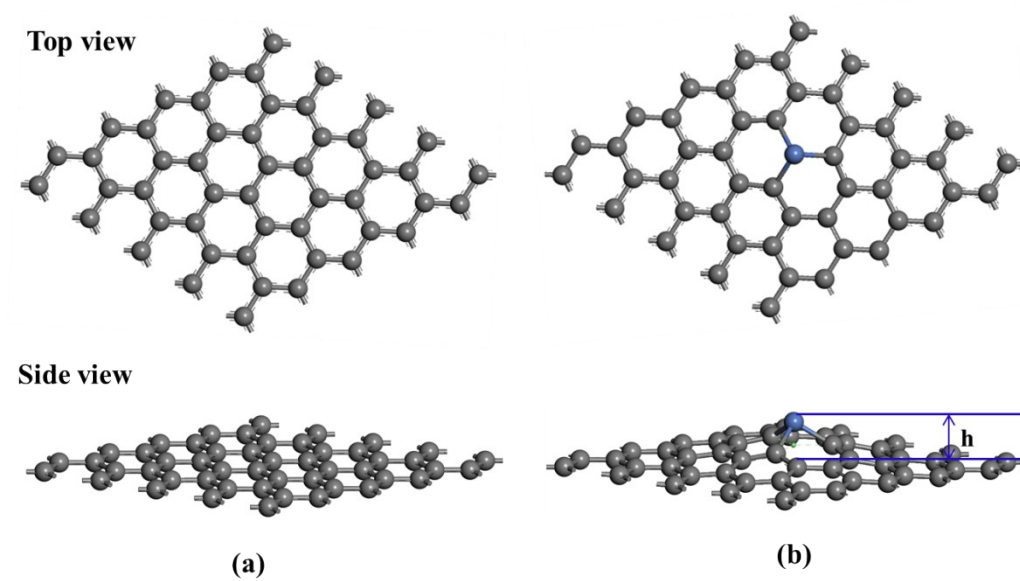

**Figure S1.** The optimized structures of (a) perfect-graphene sheet, (b) one Ni atom deposited on graphene with an elevation ( $h$ ) of  $1.498\text{\AA}$ .

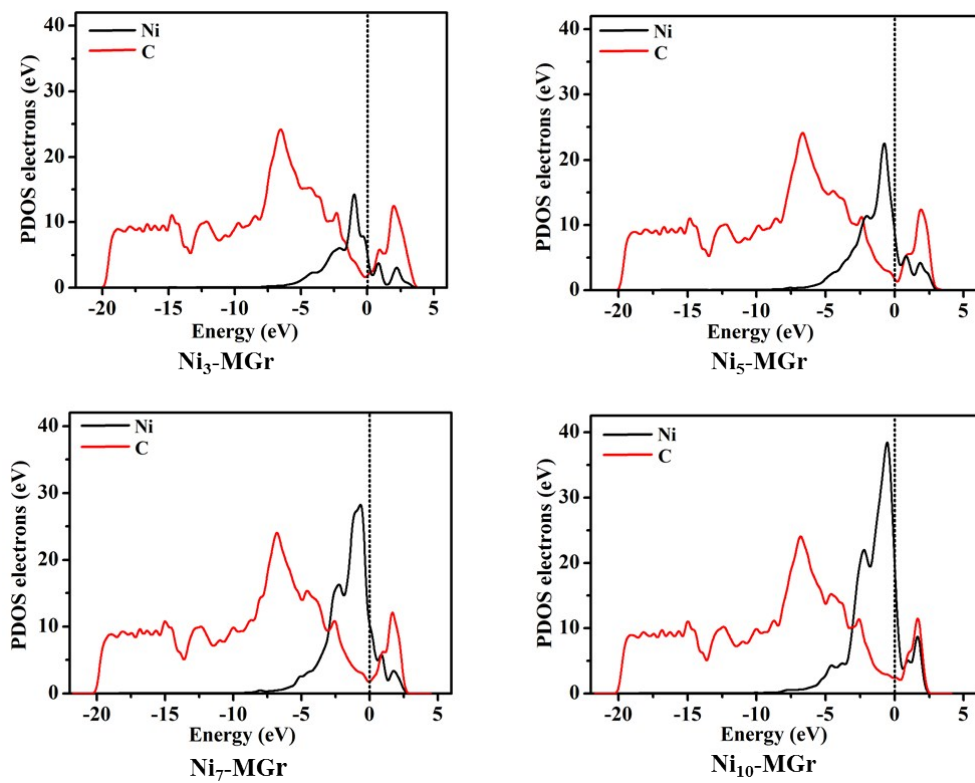

**Figure S2.** PDOS of Ni atom and C atom in a) three, b) five, c) seven and d) ten Ni atoms adsorbed on MGr. The PDOS is projected on the orbitals of C (red) and Ni (black) atoms.

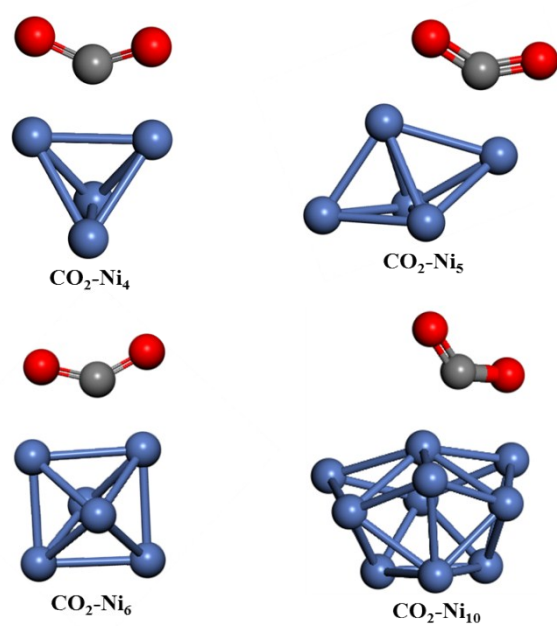

**Figure S3.** Stable configurations of CO<sub>2</sub> adsorbed on Ni<sub>4</sub>, Ni<sub>5</sub>, Ni<sub>6</sub> and Ni<sub>10</sub> cluster.

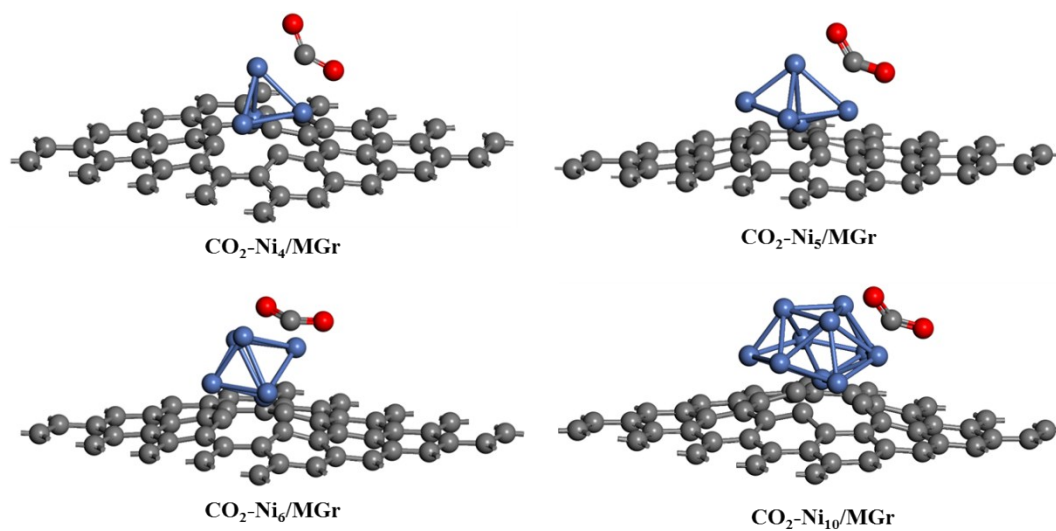

**Figure S4.** Stable configurations of CO<sub>2</sub> adsorbed on MGr surface deposition of Ni<sub>4</sub>, Ni<sub>5</sub>, Ni<sub>6</sub> and Ni<sub>10</sub> cluster.

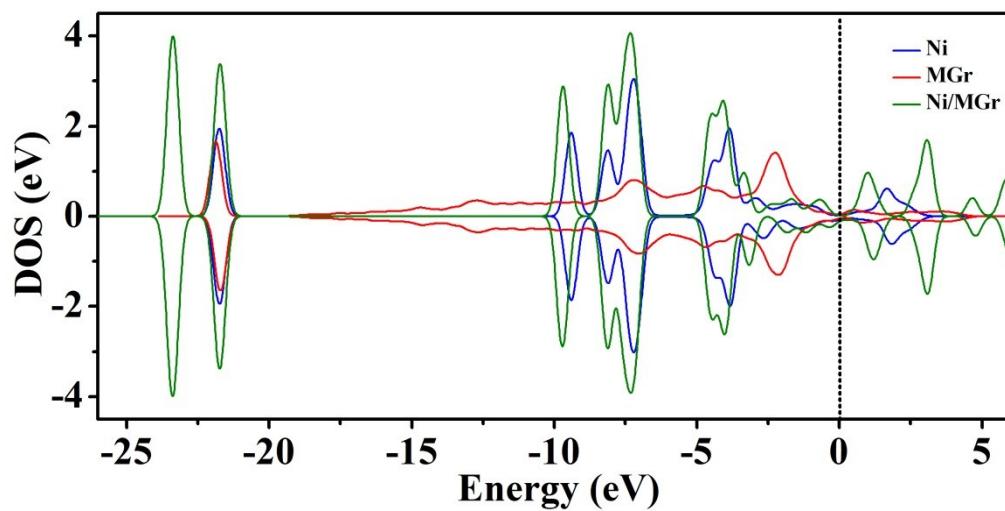

**Figure S5.** Sum of density of states projected on the atoms of the CO<sub>2</sub> molecule adsorbed on isolated Ni<sub>4</sub> (red), on MGr surface (blue) and on the Ni<sub>4</sub>/MGr system (green). The zero energy is set to the highest occupied state of corresponding system.

**Table S1** Binding energy  $E_B$ , C-O bond length  $d_{C-O}$  and O-C-O angle  $\alpha_{O-C-O}$  of CO<sub>2</sub> adsorbed on an isolated Ni<sub>x</sub> cluster, on MGr and on a graphene doped Ni<sub>x</sub> cluster.

| Substrate                | $E_B$ , CO <sub>2</sub> (eV) | $d_{C-O(1)}$ (Å) | $d_{C-O(2)}$ (Å) | $\alpha_{O-C-O}$ (°) |
|--------------------------|------------------------------|------------------|------------------|----------------------|
| CO <sub>2</sub>          | -                            | 1.175            | 1.175            | 180.00               |
| MGr                      | -1.35                        | 1.376            | 1.377            | 107.86               |
| Ni <sub>4</sub> cluster  | -1.80                        | 1.263            | 1.262            | 136.26               |
| Ni <sub>4</sub> /MGr     | -2.72                        | 1.250            | 1.243            | 140.31               |
| Ni <sub>5</sub> cluster  | -1.55                        | 1.250            | 1.260            | 138.00               |
| Ni <sub>5</sub> /MGr     | -2.05                        | 1.252            | 1.252            | 138.90               |
| Ni <sub>6</sub> cluster  | -1.43                        | 1.263            | 1.248            | 138.23               |
| Ni <sub>6</sub> /MGr     | -1.76                        | 1.254            | 1.250            | 139.96               |
| Ni <sub>10</sub> cluster | -1.42                        | 1.220            | 1.298            | 132.39               |
| Ni <sub>10</sub> /MGr    | -4.03                        | 1.239            | 1.265            | 138.29               |

It can be seen that, CO<sub>2</sub> molecule has the greatest transformation on MGr surface compared with the other adsorbing materials, which indicates that activation of CO<sub>2</sub> on MGr is the most obvious. For Ni<sub>5</sub> and Ni<sub>6</sub>, the activation degree of CO<sub>2</sub> is similar, however, the  $E_B$  of CO<sub>2</sub> on Ni<sub>x</sub>/MGr is lower than Ni<sub>x</sub>, which can be expressed by two aspects: on one hand, Ni cluster, as a medium, can transfer electrons from CO<sub>2</sub> to MGr well, so the ability of combine with CO<sub>2</sub> and Ni<sub>x</sub>/MGr enhanced significantly.

And the other hand is that, CO<sub>2</sub> molecule may change the electrons distribution of Ni<sub>x</sub>/MGr, and leads to the system tend to be more stable when adsorbed on it.
